# Supplementary material for: Tie2 activation promotes choriocapillary regeneration for alleviating neovascular age-related macular degeneration
Source: PubMed Central journal article supplement — Sci Adv. 2019 Feb 13;5(2):eaau6732. doi: 10.1126/sciadv.aau6732 (PMC6374104; doi:10.1126/sciadv.aau6732), 2019-02-13
Supplement: aau6732_SM.pdf [file aau6732_SM.pdf]

## Supplementary Materials for

### **Tie2 activation promotes choriocapillary regeneration for alleviating neovascular age-related macular degeneration**

Jaeryung Kim, Jang Ryul Park, Jeongwoon Choi, Intae Park, Yoonha Hwang, Hosung Bae, Yongjoo Kim, WooJhon Choi, Jee Myung Yang, Sangyeul Han, Tae-Young Chung, Pilhan Kim, Yoshiaki Kubota, Hellmut G. Augustin, Wang-Yuhl Oh\*, Gou Young Koh\*

\*Corresponding author. Email: [gykoh@kaist.ac.kr](mailto:gykoh@kaist.ac.kr) (G.Y.K.); [wohl@kaist.ac.kr](mailto:wohl@kaist.ac.kr) (W.-Y.O.)

Published 13 February 2019, *Sci. Adv.* **5**, eaau6732 (2019)

DOI: 10.1126/sciadv.aau6732

#### **The PDF file includes:**

- Fig. S1. Expressions of Tie2 and Angpt1 in the RPE-choroid complex.
- Fig. S2. Generation of en face OCT angiograms for measurement of retinal and choroidal blood flow.
- Fig. S3. Elevated IOP is not responsible for reduced choroidal blood flow.
- Fig. S4. Global *Angpt1* deletion in adult mice causes damage and loss of choriocapillaris.
- Fig. S5. Loss of cone but not of rod photoreceptor in the eyes of global *Angpt1*-depleted mice.
- Fig. S6. ABTAA promotes regeneration of choriocapillaris surrounding the site of laser photocoagulation in the prevention phase.
- Fig. S7. ABTAA forms the Angpt2-Tie2-ABTAA complex in the mouse CNV model.
- Fig. S8. Analyses of the effects of ABTAA treatment in adult *Tie2*-depleted mice.
- Fig. S9. RNA-seq analysis of CNV lesions and surrounding tissues treated with VEGF-Trap and ABTAA.
- Fig. S10. ABTAA binds to ANGPT2 and activates TIE2 and its downstream effectors.

#### **Other Supplementary Material for this manuscript includes the following:**

(available at [advances.sciencemag.org/cgi/content/full/5/2/eaau6732/DC1](https://advances.sciencemag.org/cgi/content/full/5/2/eaau6732/DC1))

Table S1 (Microsoft Excel format). List of disease and biological function signatures identified by IPA in the CNV lesions and the surrounding RPE-choroid complex treated with VEGF-Trap or ABTAA, related to fig. S9 (E and F).

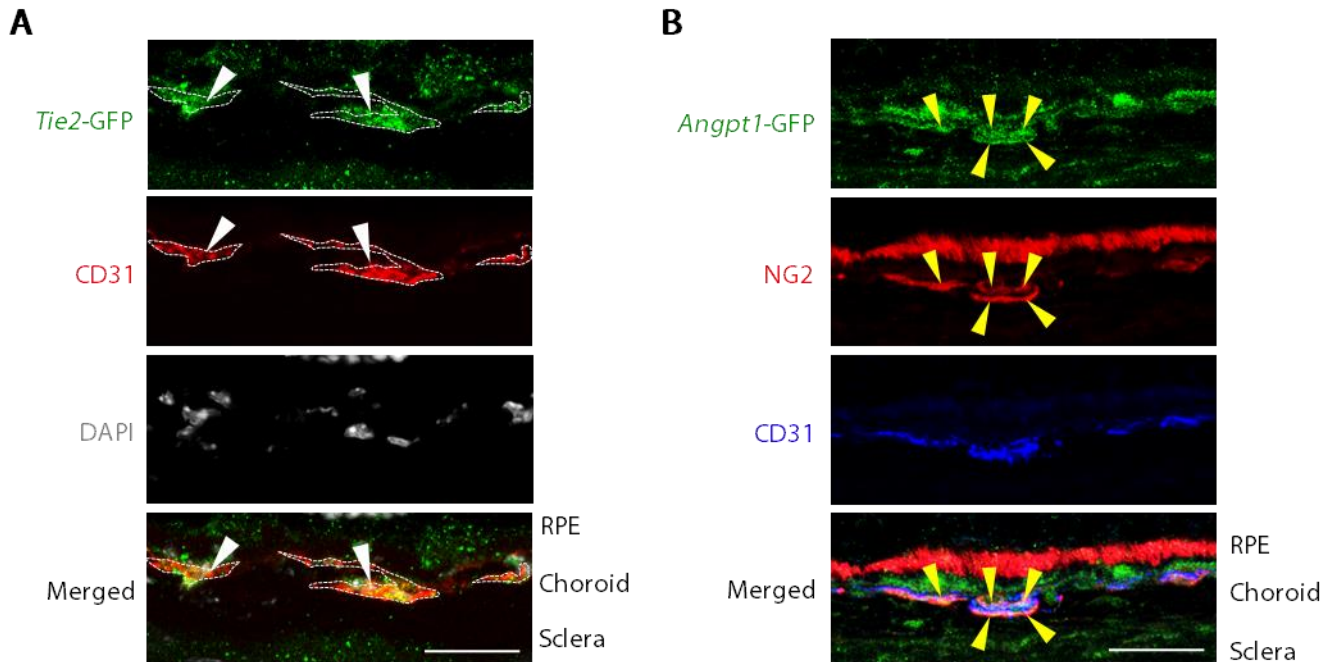

**Fig. S1. Expressions of Tie2 and Angpt1 in the RPE-choroid complex.** (A) Cross-sectional images of RPE-choroid complex of *Tie2*-GFP mouse. Note that GFP signals are detected in ECs of choroidal vessels (white arrowheads). Scale bar, 20  $\mu$ m. Dashed lines demarcate the margins of choriocapillaris. (B) Cross-sectional images of RPE-choroid complex of *Angpt1*-GFP mouse. Note that GFP signals are detected in pericytes around choriocapillaris (yellow arrowheads). Scale bar, 20  $\mu$ m.

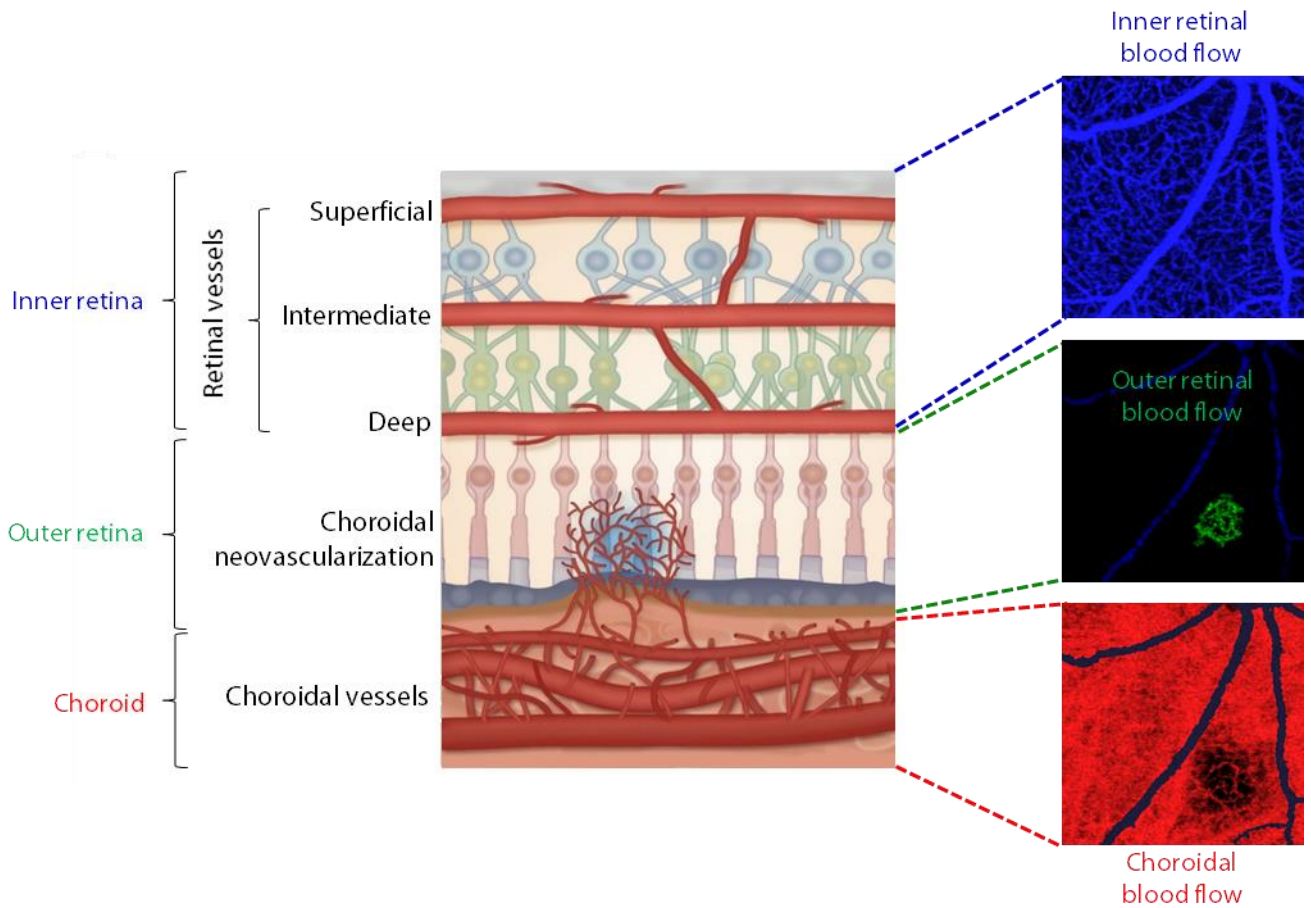

**Fig. S2. Generation of en face OCT angiograms for measurement of retinal and choroidal blood flow.** Schematic diagram defining inner retinal, outer retinal, and choroidal layers. *En face* OCT angiograms were visualized by separate projections of each flattened cross-sectional OCT angiogram in three depth ranges: inner retinal, outer retinal, and choroidal layers. The outer plexiform layer and Bruch's membrane are the boundaries separating inner retinal, outer retinal, and choroidal layers.

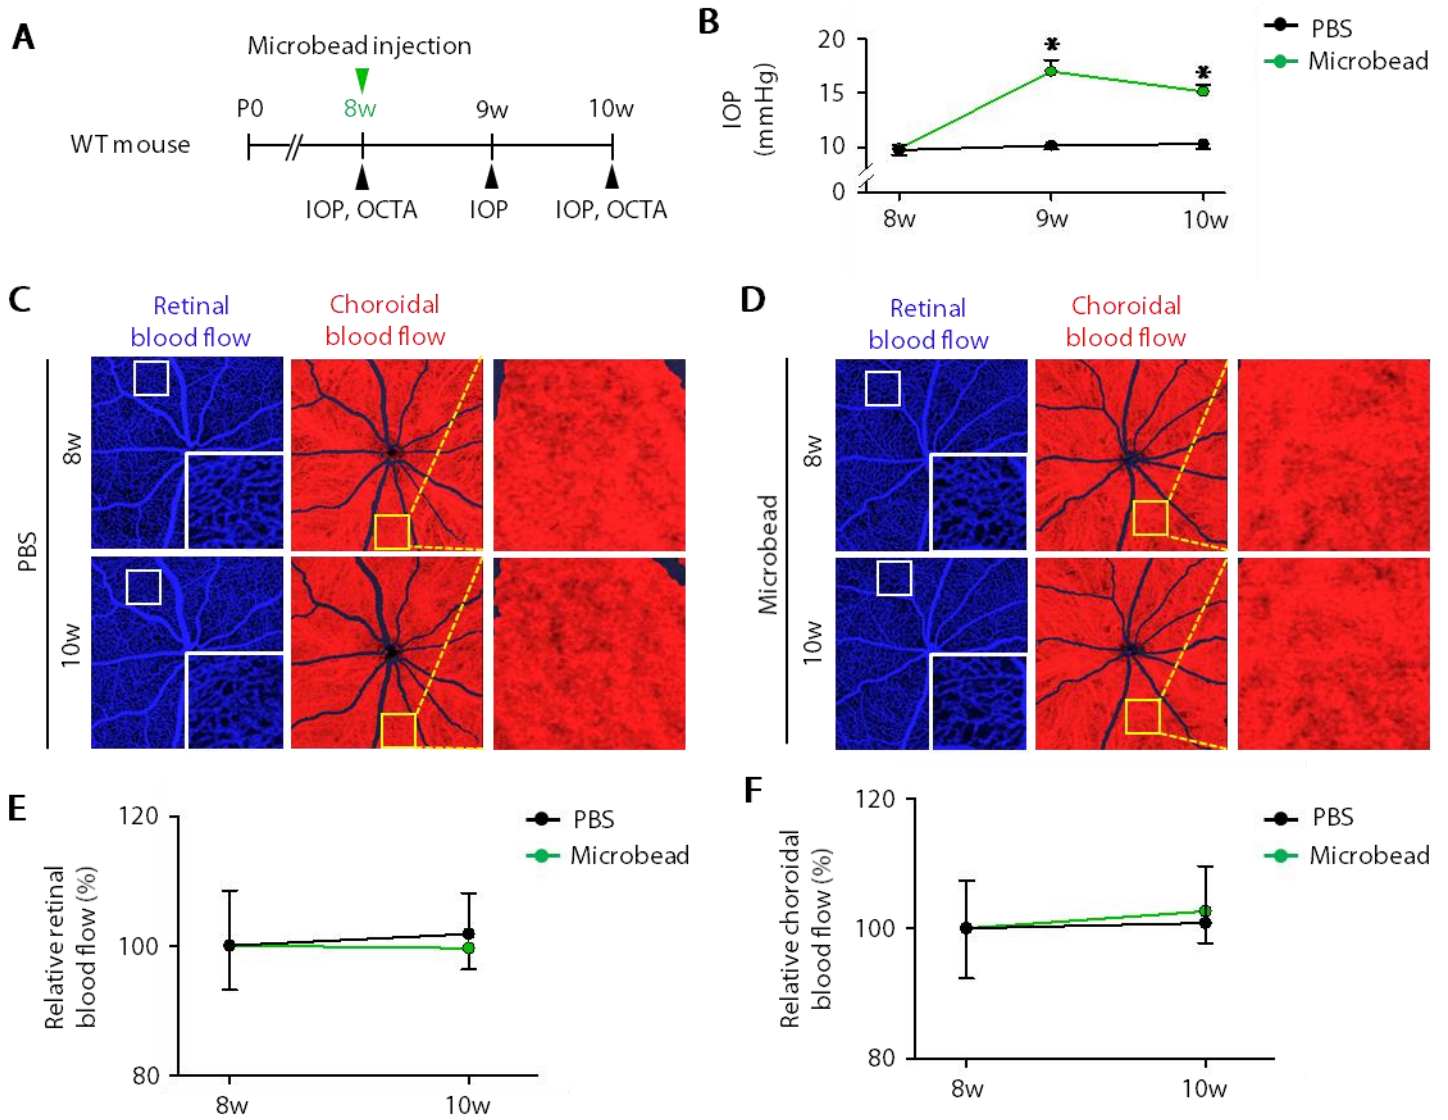

**Fig. S3. Elevated IOP is not responsible for reduced choroidal blood flow.** (A) Diagram depicting the experiment schedule of microbeads injection-induced ocular hypertension model in 8-week-old WT mice. Eyes were injected with 1 and 6  $\mu\text{m}$ -sized microbeads in PBS (2  $\mu\text{l}$ ). (B) Temporal changes in IOP. (C and D) *En face* OCT angiograms showing retinal blood flow (left panels) and choroidal blood flow (middle panels) acquired by longitudinal OCTA imaging of eyes. Each area marked by a white box is magnified in the corner. Each area marked by a yellow box is magnified on the right panel. (E and F) Temporal changes in relative retinal (E) and choroidal (F) blood flow. Error bars represent mean  $\pm$  s.d. Each group,  $n = 7$ .  $*P < 0.05$  vs. WT by Mann-Whitney  $U$  test.

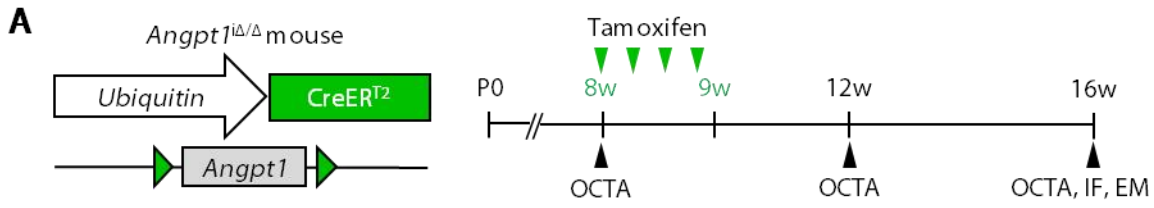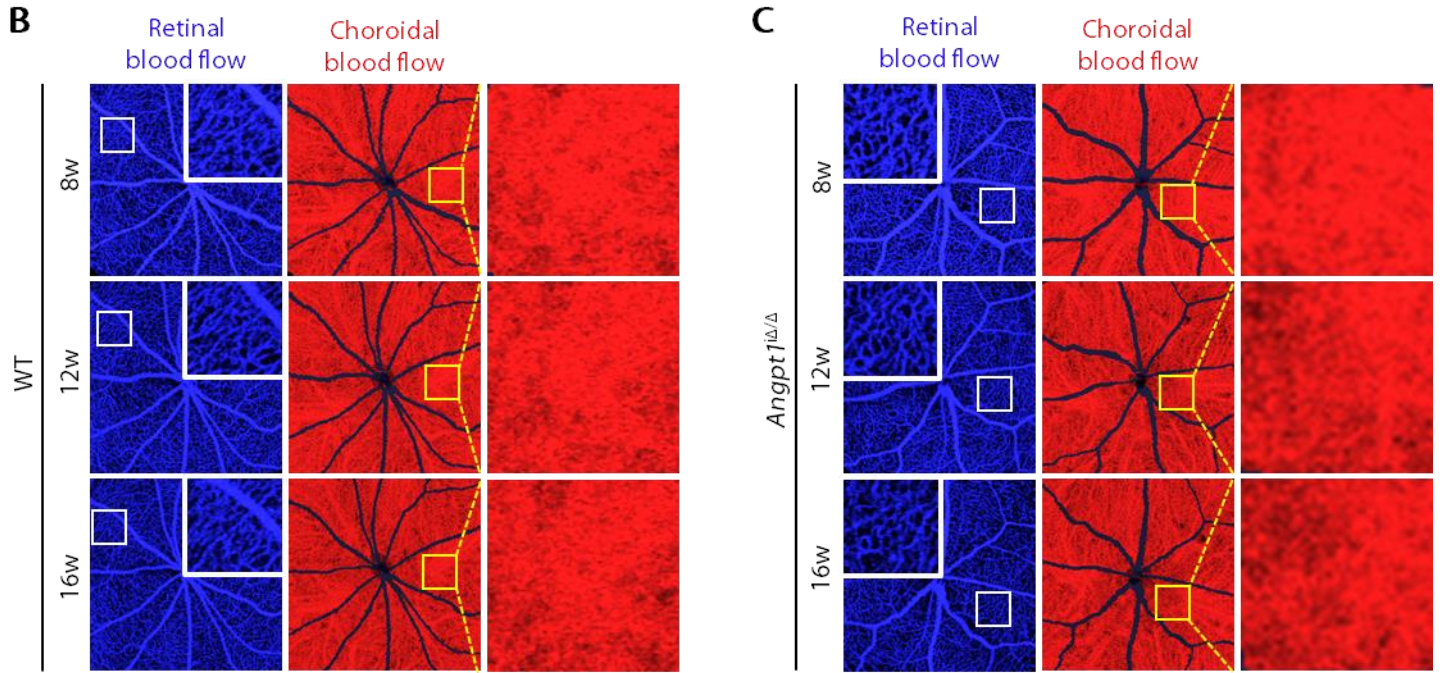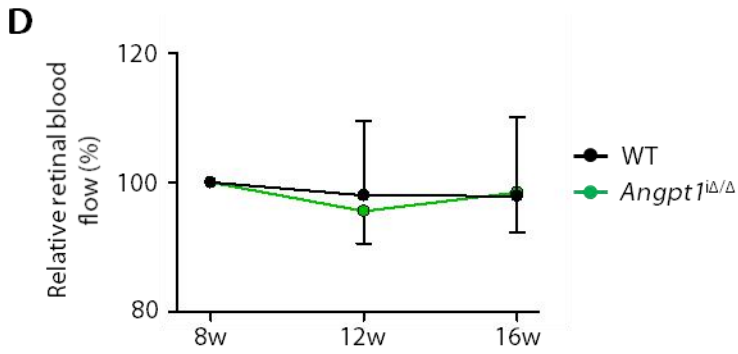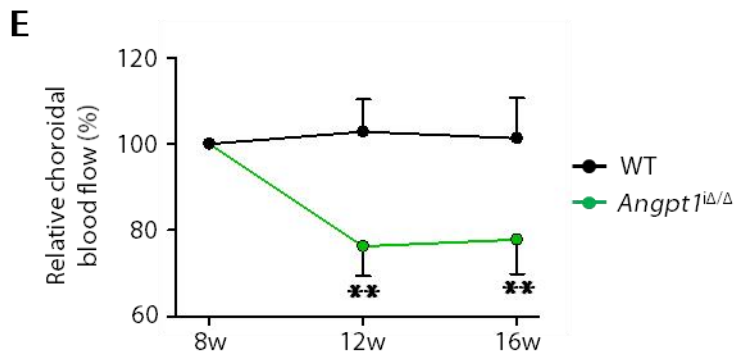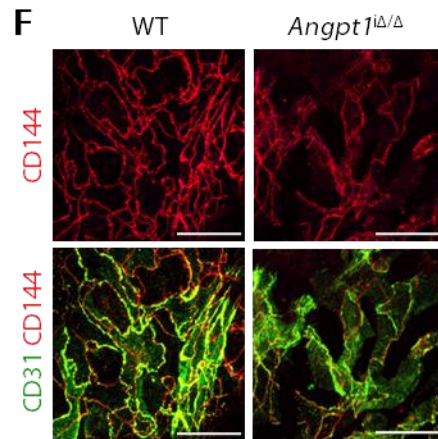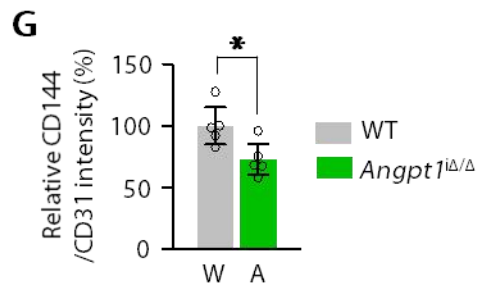

**Fig. S4. Global *Angpt1* deletion in adult mice causes damage and loss of choriocapillaris.** (A) Diagram of schedule for global depletion of *Angpt1* in 8-week-old mice and analyses at 8, 12, and 16 weeks of age using *Angpt1*<sup>iΔ/Δ</sup> mice. (B and C) *En face* OCT angiograms showing retinal blood flow (left panels) and choroidal blood flow (middle panels) acquired by longitudinal OCTA imaging of eyes. Each area marked by a white box is magnified in the corner. Each area marked by a yellow box is magnified on the right panel. (D and E) Temporal changes in relative retinal (D) and choroidal (E) blood flow. Error bars represent mean ± s.d. Each group, n = 10. \*\**P* < 0.005 vs. WT by unpaired Student's *t*-test. (F and G) Images and comparison of CD144 intensity in CD31<sup>+</sup> choriocapillaris. Error bars represent mean ± s.d. Each group, n = 5. \**P* < 0.05 vs. WT by Mann-Whitney *U* test. Scale bars, 20 μm.

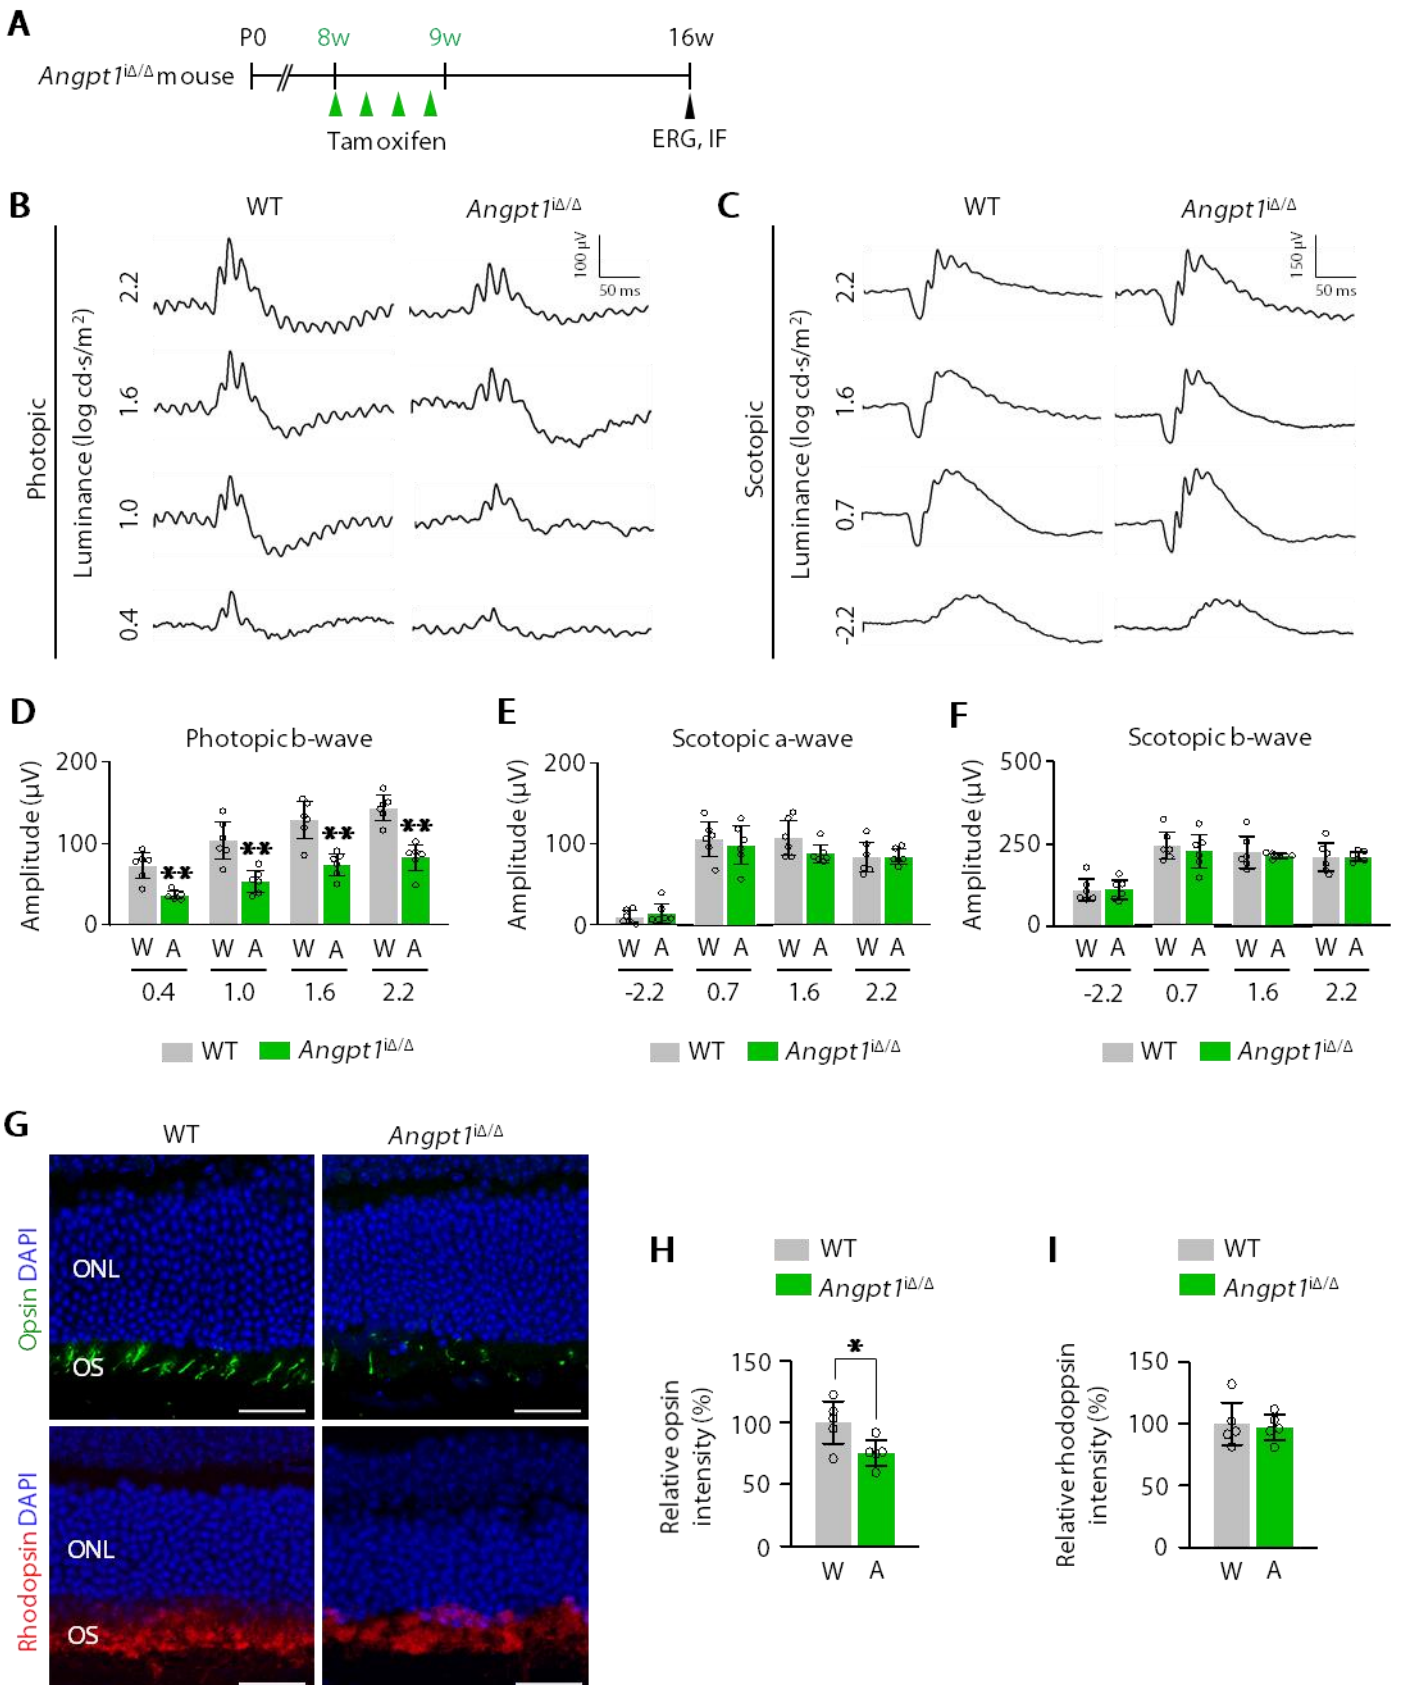

**Fig. S5. Loss of cone but not of rod photoreceptor in the eyes of global *Angpt1*-depleted mice.** (A) Diagram for global depletion of *Angpt1* in 8-week-old mice and analyses 2 months later using *Angpt1*<sup>iΔ/Δ</sup> mice. (B and C) Representative wave responses of ERG in photopic (B) and scotopic (C) condition. (D) Comparisons of b-wave in photopic condition. Error bars represent mean ± s.d. Each group, n = 6. \*\**P* < 0.005 vs. WT by Mann-Whitney *U* test. (E and F) Comparisons of a- and b-wave amplitudes in scotopic condition. Error bars represent mean ± s.d. Each group, n = 6. (G-I) Expression of opsin and rhodopsin in photoreceptor layer. Error bars represent mean ± s.d. Each group, n = 6. \**P* < 0.05 vs. WT by Mann-Whitney *U* test. Scale bars, 20 μm.



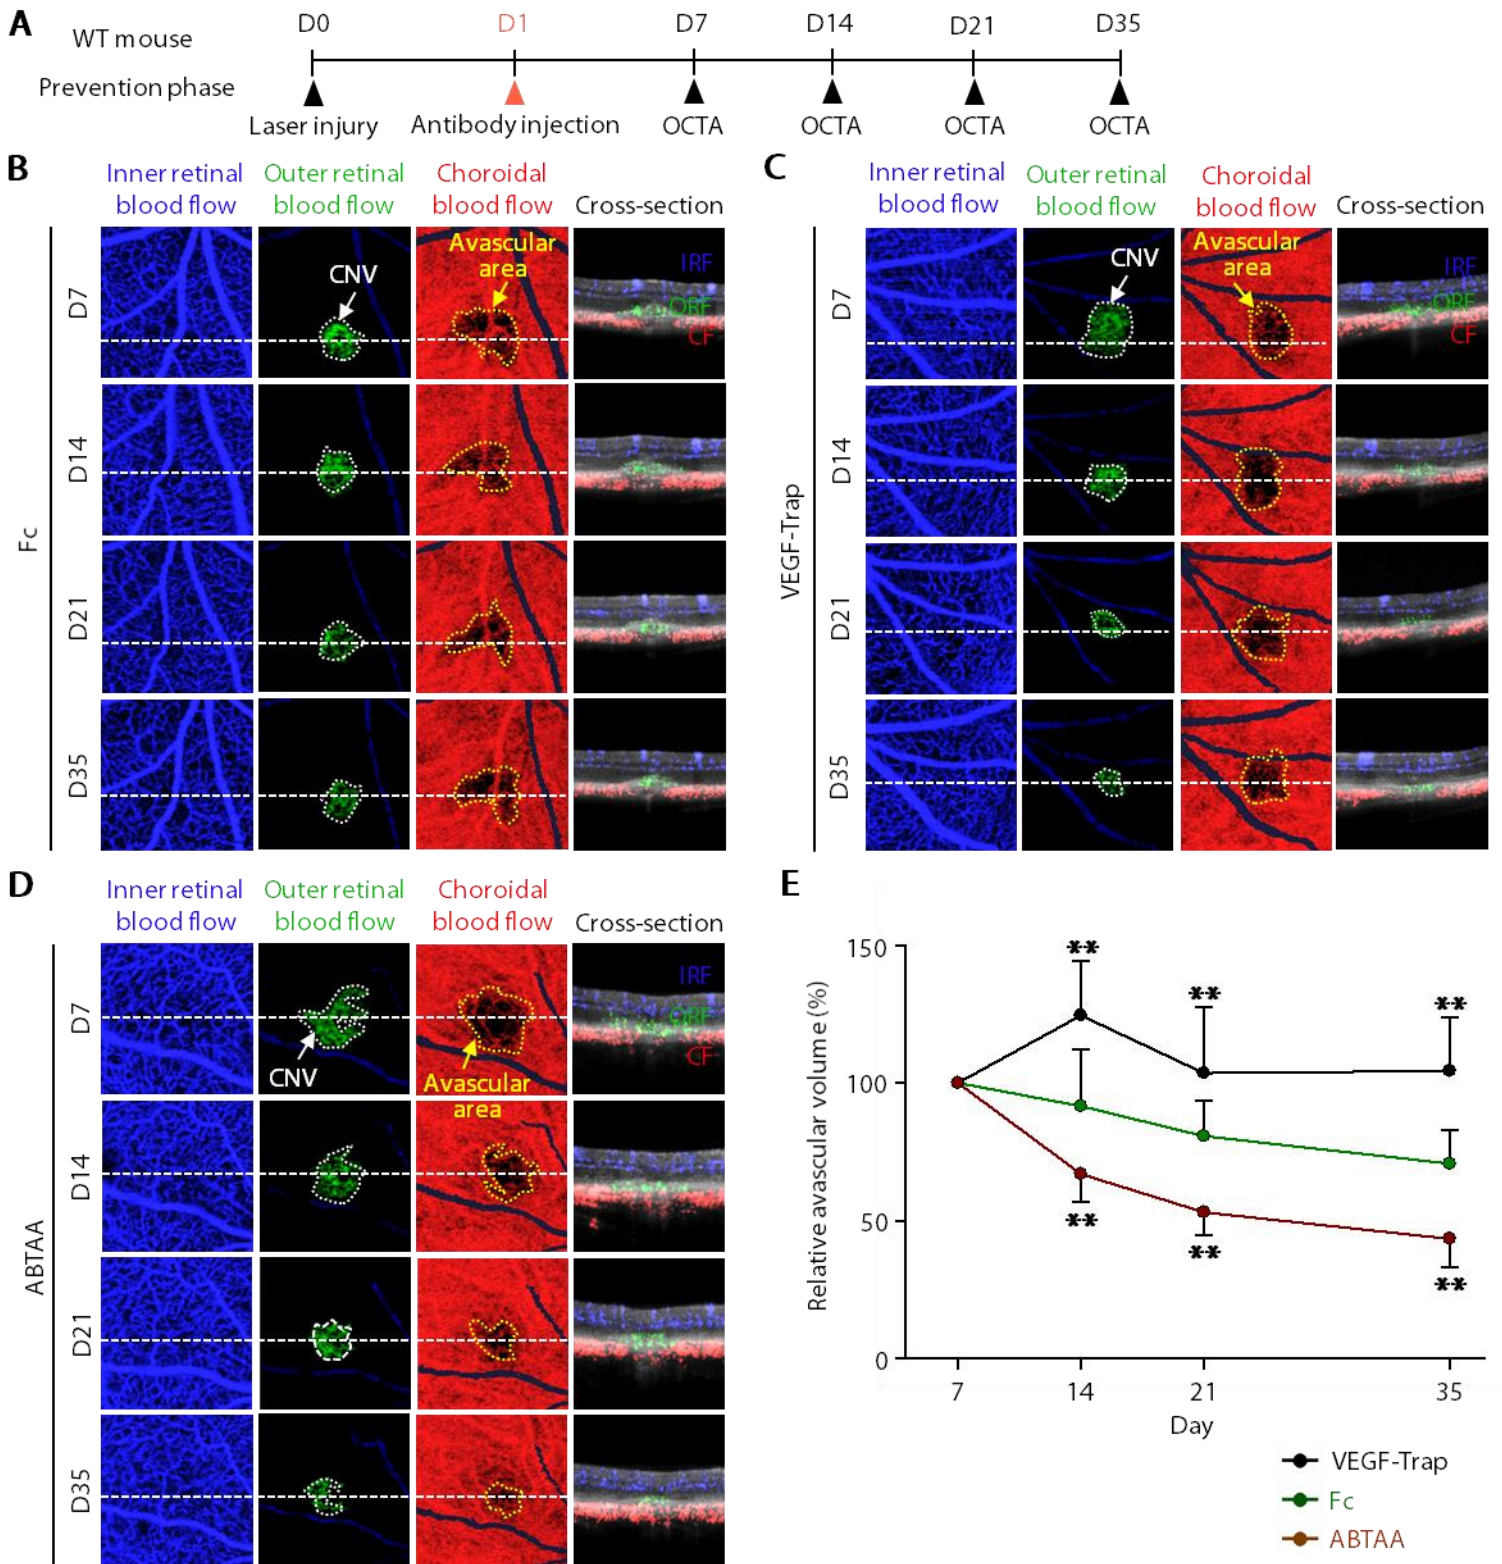

**Fig. S6. ABTAA promotes regeneration of choriocapillaris surrounding the site of laser photocoagulation in the prevention phase.** (A) Diagram of schedule for induction of CNV at D0, intravitreal administration of Fc, VEGF-Trap, or ABTAA (5 µg each) at D1, and intra-vital OCTA at D7, D14, D21, and D35 as a prevention phase. (B-D) *En face* OCT angiograms and selected cross-sectional OCT angiograms of the locations indicated by the white dotted lines showing inner retinal blood flow (blue), outer retinal blood flow (green), and choroidal blood flow (red) acquired by longitudinal OCTA imaging of eyes treated with Fc, VEGF-Trap, or ABTAA. *En face* angiogram of the outer retina showing the CNV (area demarcated by the white dotted boundary) and the choroid with avascular space (area demarcated by the yellow dotted boundary) surrounding the CNV. (E) Temporal changes in relative avascular volumes surrounding the site of laser photocoagulation. Error bars represent mean ± s.d. Each group, n = 13 to 17. \*\* $P < 0.005$  vs. Fc by one-way ANOVA followed by Student-Newman-Keuls post hoc test.

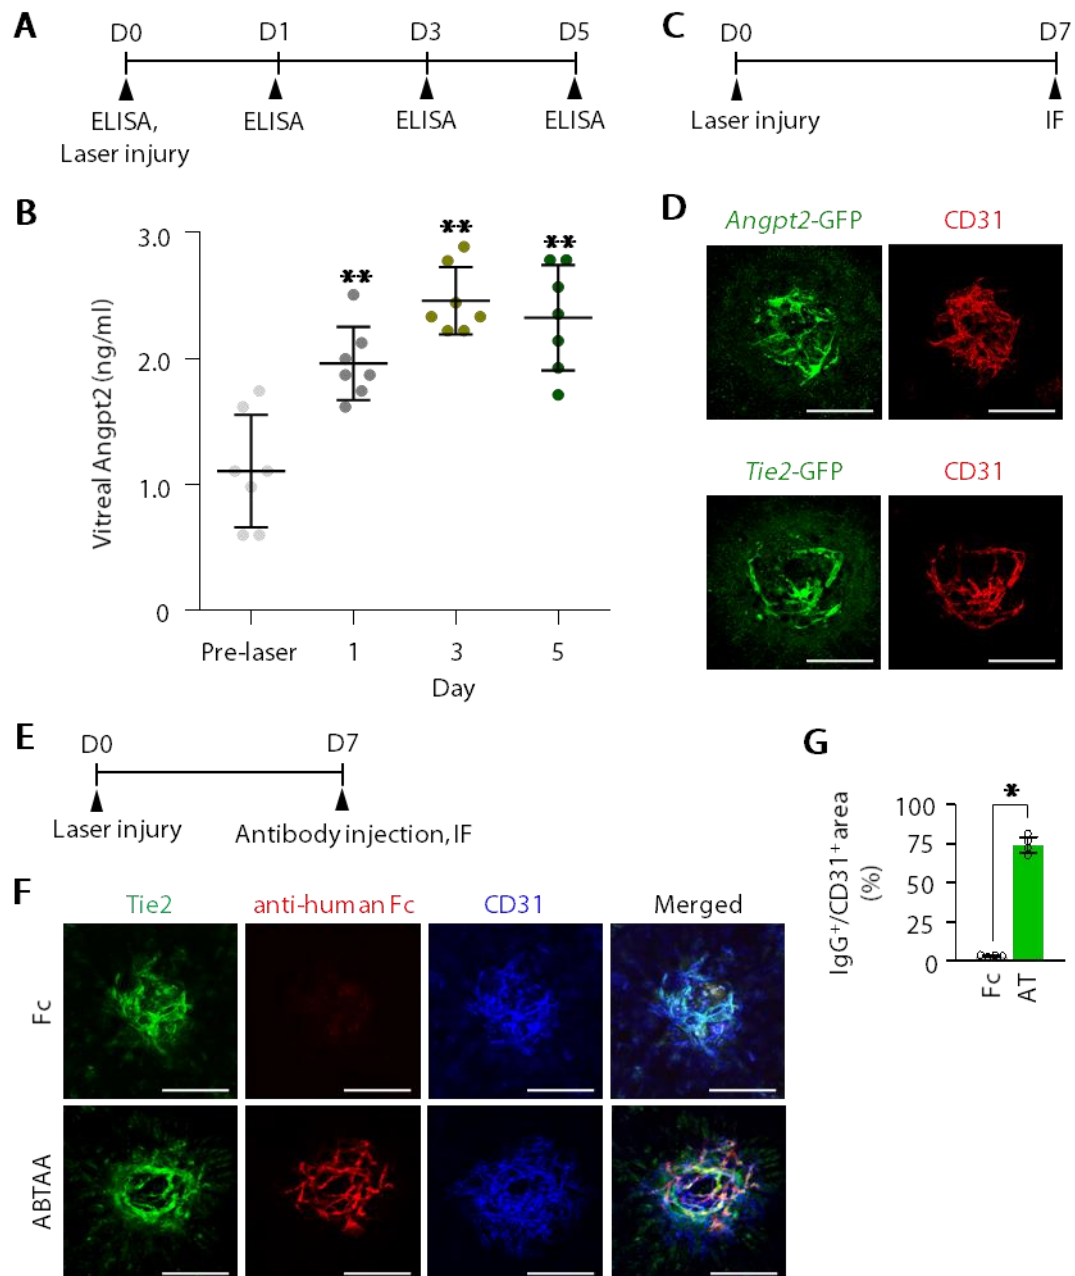

**Fig. S7. ABTAA forms the Angpt2-Tie2-ABTAA complex in the mouse CNV model.** (A) Diagram of schedule for induction of CNV at D0 and ELISA at pre-laser, D1, D3, and D5. (B) Comparison of temporal changes in vitreal Angpt2 level. Error bars represent mean  $\pm$  s.d. Each group,  $n = 7$ .  $**P < 0.005$  vs Pre-laser by Mann-Whitney  $U$ -test. (C) Diagram of schedule for induction of CNV at D0 and IF staining at D7. (D) Representative images showing Angpt2<sup>+</sup> or Tie2<sup>+</sup> ECs of laser-induced CNV. Scale bars, 100  $\mu$ m. (E) Diagram of schedule for induction of CNV at D0, intravitreal administration of Fc or ABTAA (5  $\mu$ g each) at D7, and IF staining at 30 min after intravitreal administration. (F and G) Images and comparisons of expressions of Tie2 and CD31, and co-localization of Fc or ABTAA in ECs of CNV. Fc or ABTAA was directly detected with anti-human IgG antibody. Error bars represent mean  $\pm$  s.d. Each group,  $n = 4$ .  $*P < 0.05$  by Mann-Whitney  $U$ -test. AT, ABTAA. Scale bars, 100  $\mu$ m.

**A**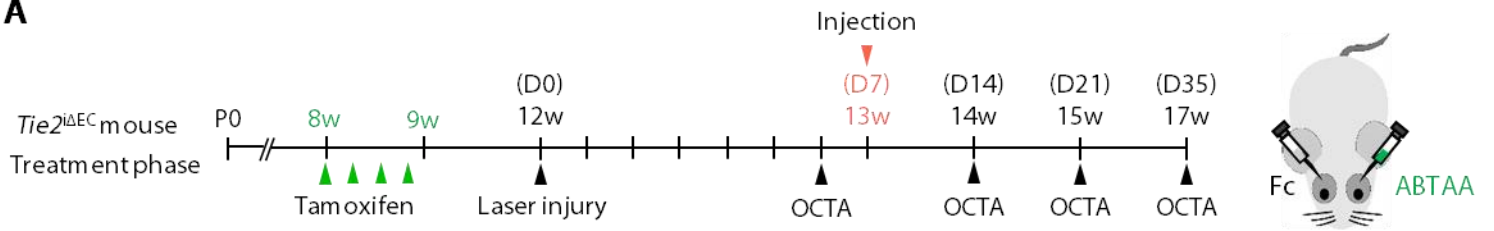**B**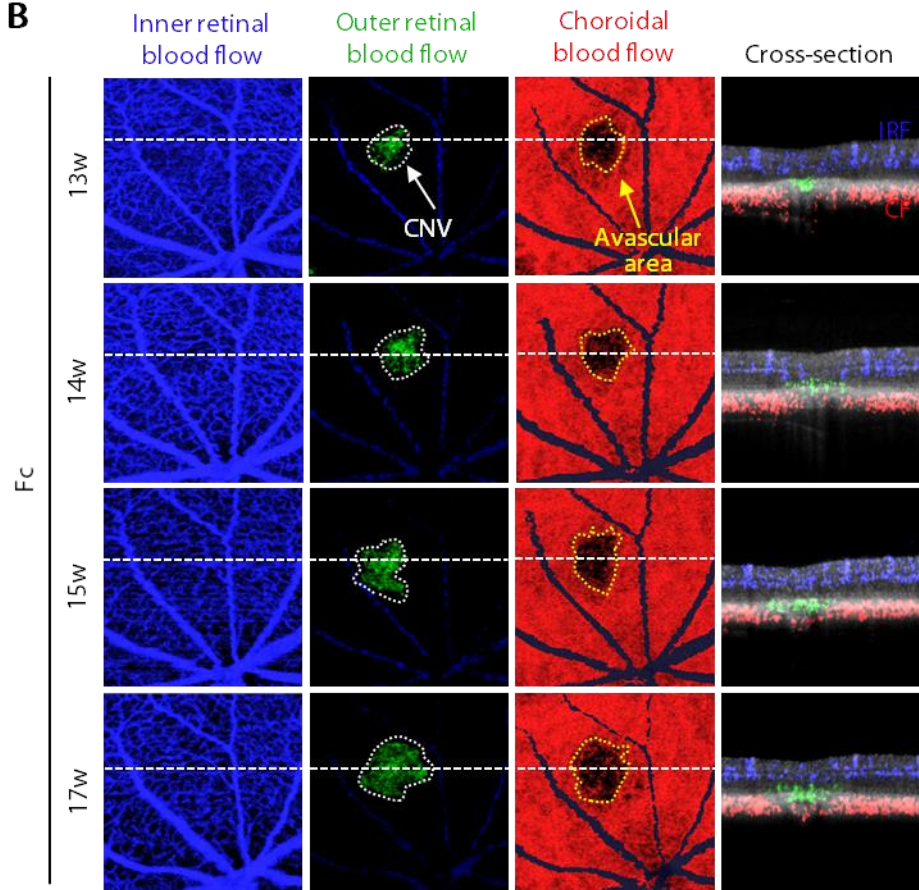**D**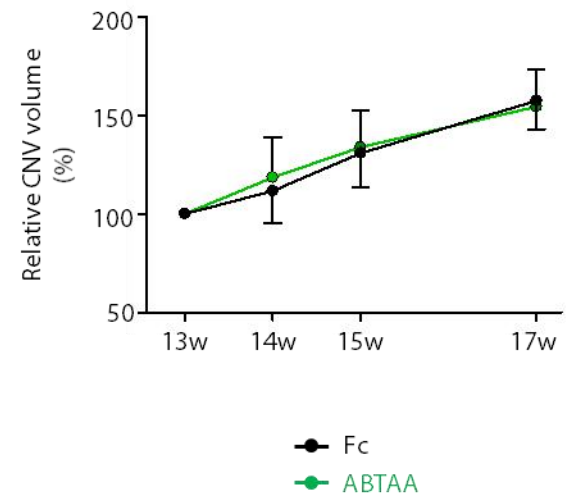**E**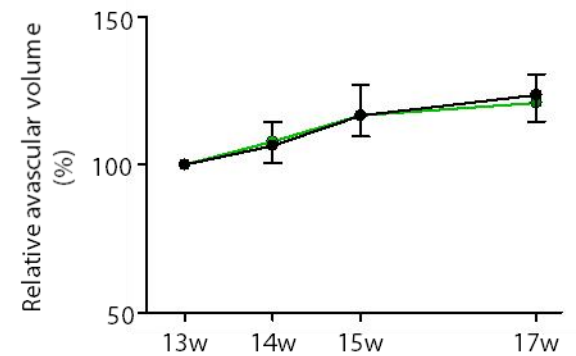**C**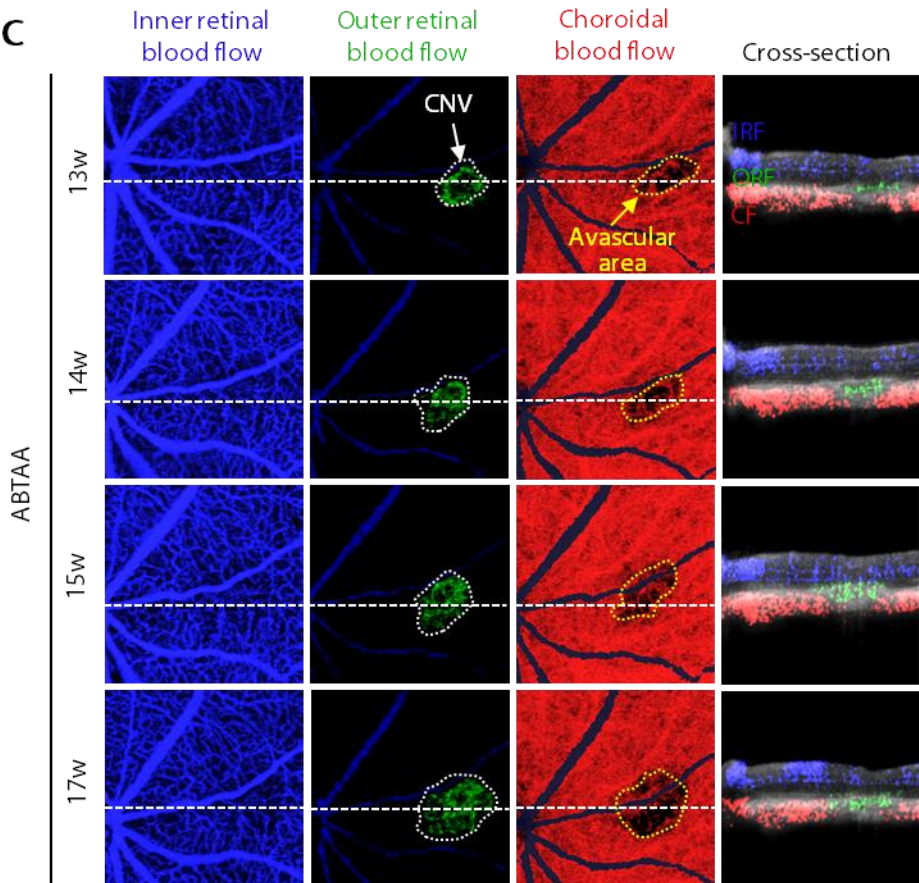

**Fig. S8. Analyses of the effects of ABTAA treatment in adult *Tie2*-depleted mice.** (A) Diagram of schedule for EC-specific depletion of *Tie2* in 8-week-old mice, induction of CNV after 4 weeks (D0), intravitreal administration of Fc or ABTAA (5 µg each) at D7, and intra-vital OCTA at D6, D14, D21 and D35 using *Tie2*<sup>iΔEC</sup> mice. (B and C) *En face* OCT angiograms and selected cross-sectional OCT angiograms of the locations indicated by the white dotted lines showing inner retinal blood flow (blue), outer retinal blood flow (green), and choroidal blood flow (red) acquired by longitudinal OCTA imaging of eyes. (D and E) Temporal changes in relative CNV volume (D) and avascular volume surrounding the site of laser photocoagulation (E). Error bars represent mean ± s.d. Each group, n = 11 to 12.

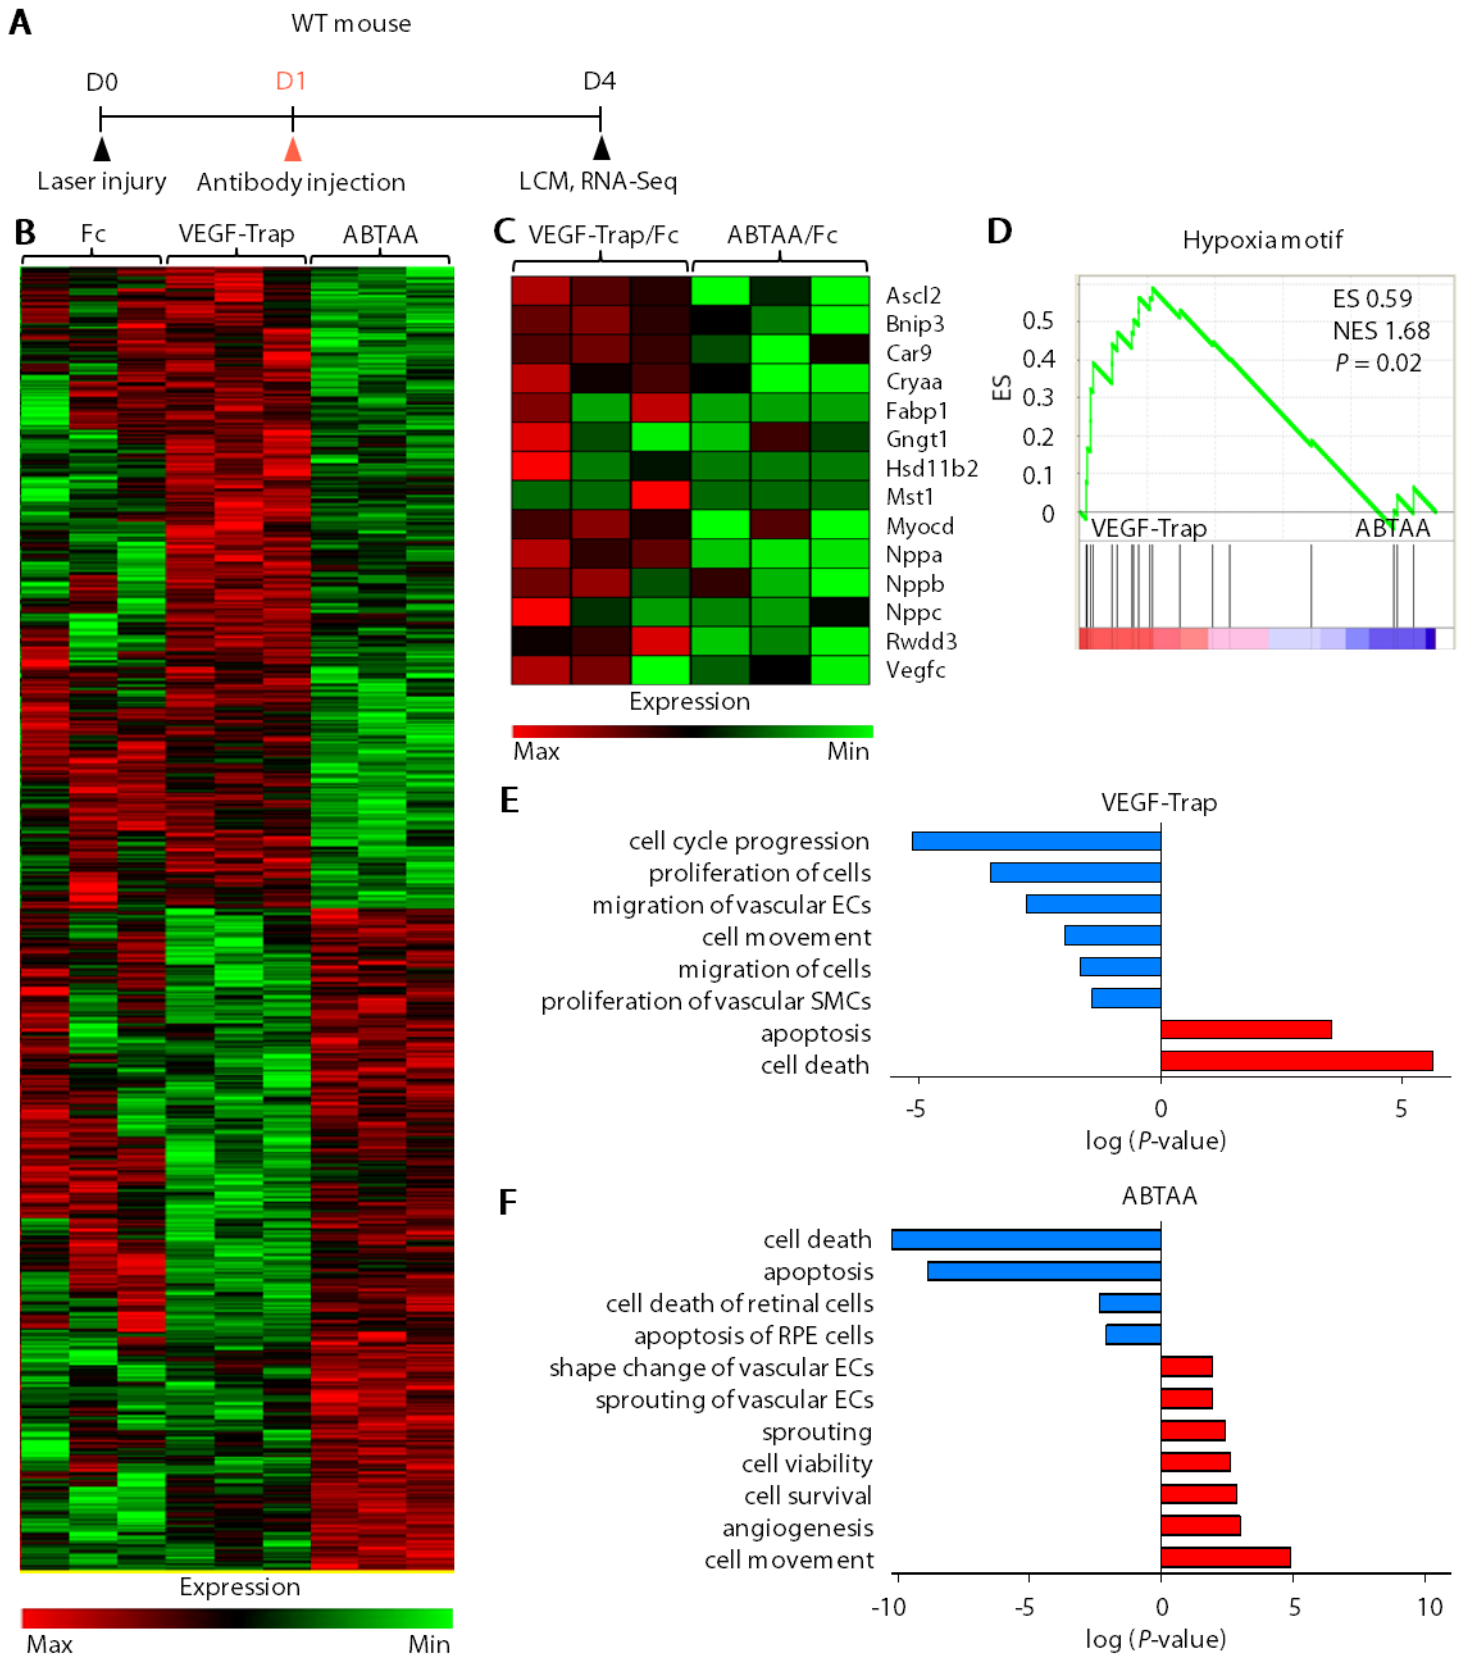

**Fig. S9. RNA-seq analysis of CNV lesions and surrounding tissues treated with VEGF-Trap and ABTAA.** (A) Diagram of schedule for induction of CNV at D0, intravitreal administration of Fc, VEGF-Trap, or ABTAA (5 µg each) at D1, and their analyses at D4. (B) RNA-Seq gene expression heatmap of DEGs ( $P < 0.05$ ) between VEGF-Trap- and ABTAA-treated groups. (C) Heatmap of hypoxia signature genes upregulated by VEGF-Trap but downregulated by ABTAA relative to Fc. (D) GSEA of hypoxia-responsive gene set in VEGF-Trap- or ABTAA-treated groups. ES, enrichment score; NES, normalized enrichment score. (E and F) Representative disease and biological functional terms of DEGs in VEGF-Trap or ABTAA group. Ranks were ordered according to their  $P$  value of Fisher's Exact test, and determined for their activation or inhibition by activation z-score. LCM, laser capture microdissection. See table S1 for details.

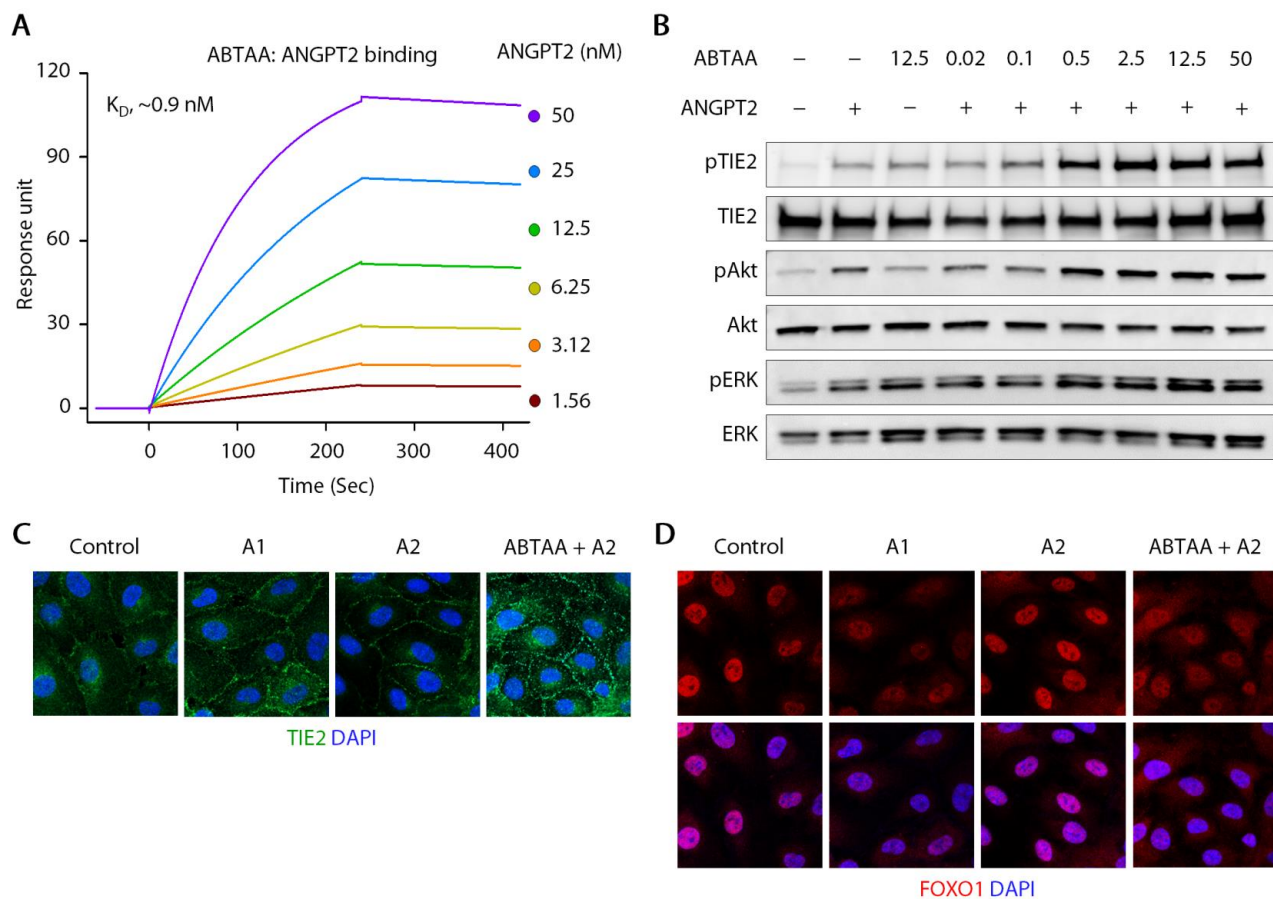

**Fig. S10. ABTAA binds to ANGPT2 and activates TIE2 and its downstream effectors.** (A) Representative dose-response surface plasmon resonance sensograms of ANGPT2 binding to immobilized ABTAA. ANGPT2 concentrations in each injection are indicated by different colors. (B-D) Serum-starved confluent HUVECs were treated with either ANGPT2 (A2, 1  $\mu$ g/ml) or COMP-Angpt1 (A1, 0.5  $\mu$ g/ml) with or without ABTAA for 30 min. (B) Immunoblot detection of TIE2, pTIE2, and its downstream signaling proteins Akt, pAkt, ERK, and pERK in serum-starved HUVECs that were treated with human ANGPT2 with or without ABTAA (0.02, 0.1, 0.5, 2.5, 12.5, and 50  $\mu$ g/ml). (C) Confocal images showing that ABTAA induces TIE2 translocation to cell-cell contacts. Scale bars, 20  $\mu$ m. (D) ABTAA-induced nuclear clearance of FOXO1. Scale bars, 20  $\mu$ m.
